# Supplementary material for: Shape-controlled porous nanocarbons for high performance supercapacitors
Source: Royal Society of Chemistry journal article supplement (doi:10.1039/c3ta15245f), 2014-01-01
Supplement: c3ta15245f.pdf [file c3ta15245f.pdf]

## Electronic Supplementary Information (ESI) for:

### Shape-Controlled Porous Nanocarbons for High Performance Supercapacitors

*Wei Chen, R. B. Rakhi, M. N. Hedhili and H. N. Alshareef\**

Material Science and Engineering, King Abdullah University of Science and Technology (KAUST),  
Thuwal 23955-6900, Saudi Arabia

E-mail: husam.alshareef@kaust.edu.sa

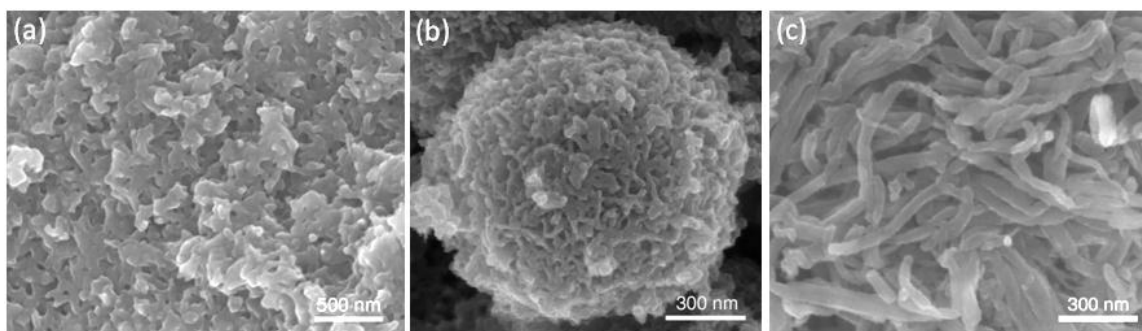

**Figure S1.** SEM images of the unactivated (a) carbon nanoparticles, (b) carbon nanosheets assembled nanospheres, and (c) carbon nanotubes.

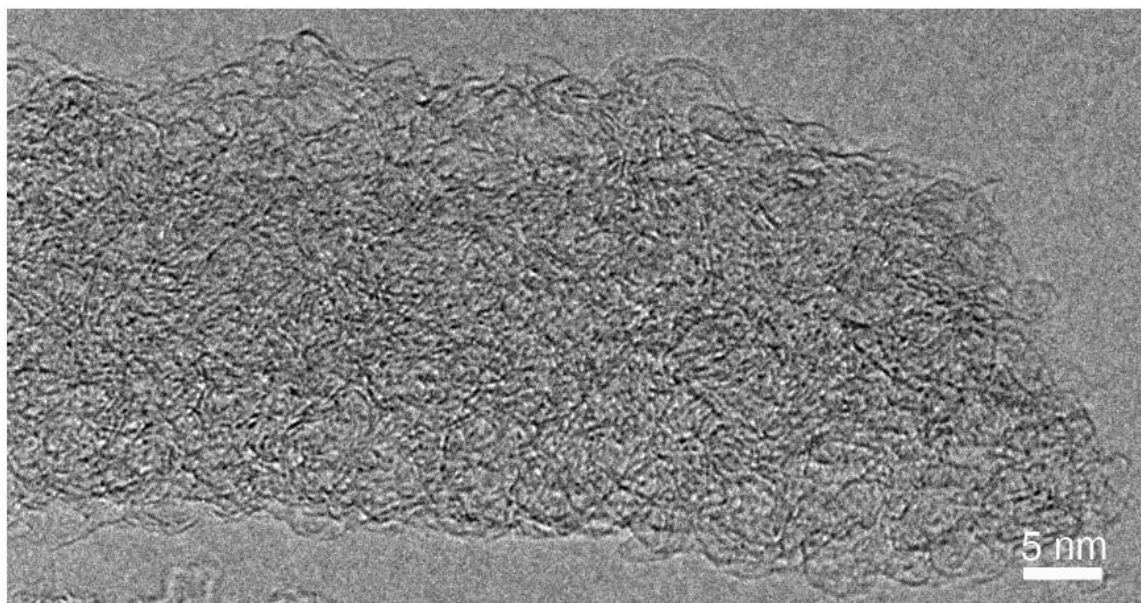

**Figure S2.** TEM image of a typical activated carbon nanotube.

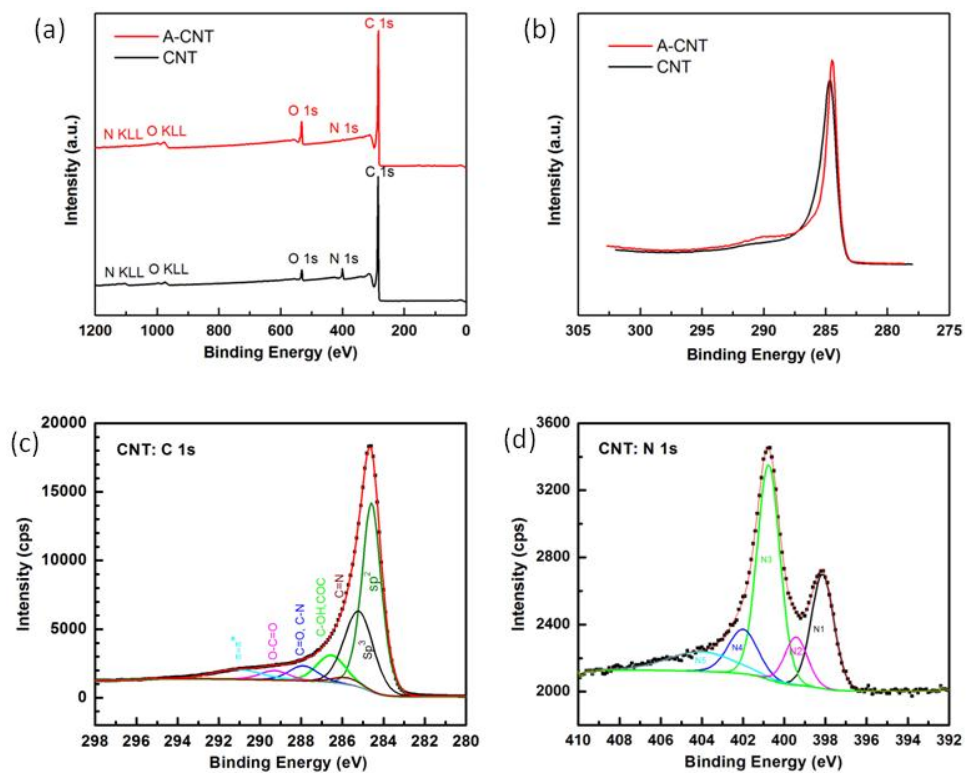

**Figure S3.** (a) XPS survey spectra of CNT and A-CNT; (b) C 1s peaks of CNT and A-CNT; High resolution XPS of the deconvoluted (c) C 1s and (d) N 1s peaks for CNT.

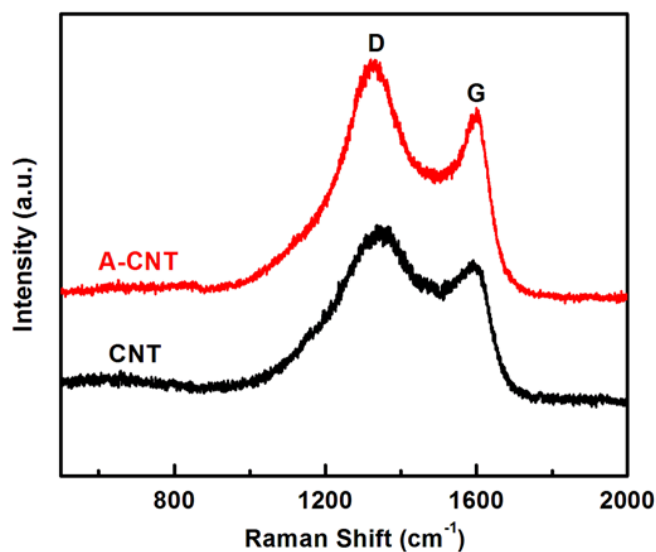

**Figure S4.** The Raman spectroscopy of CNT and A-CNT.

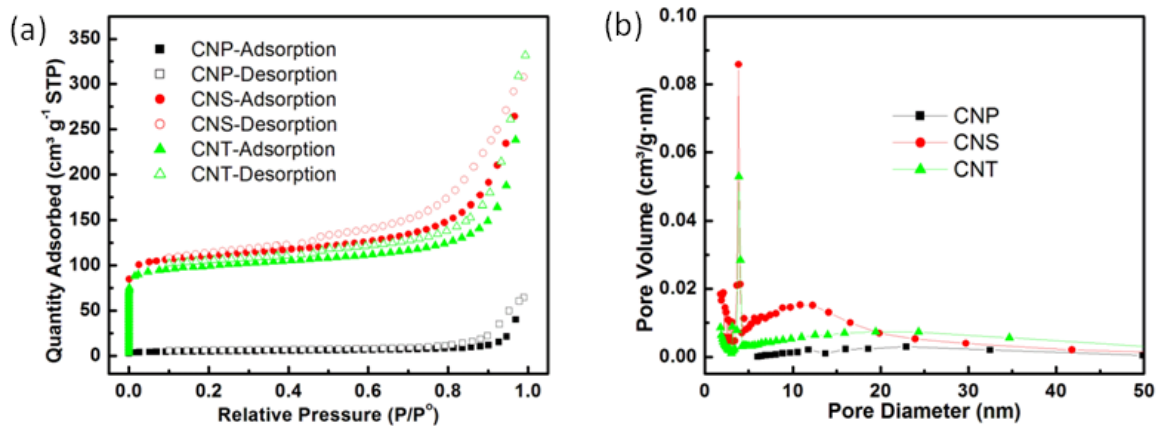

**Figure S5.** (a) Nitrogen adsorption and desorption isotherm and (b) pore size distribution curves of the three different nanocarbons without activation: CNP, CNS, and CNT.

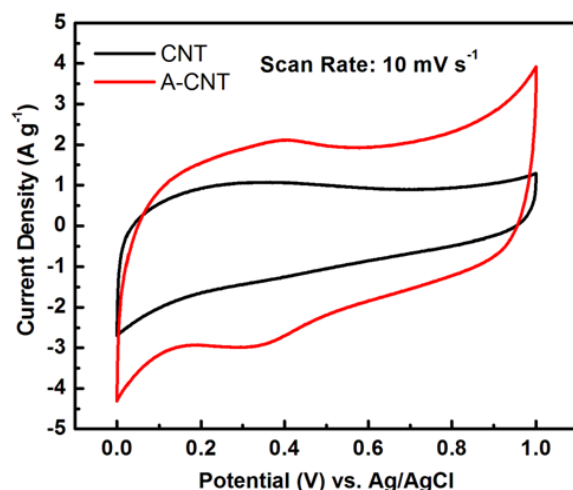

**Figure S6.** Comparison of the CV curves at the scan rate of  $10 \text{ mV s}^{-1}$  between CNT and ACNT in the three-electrode tests in aqueous electrolyte.

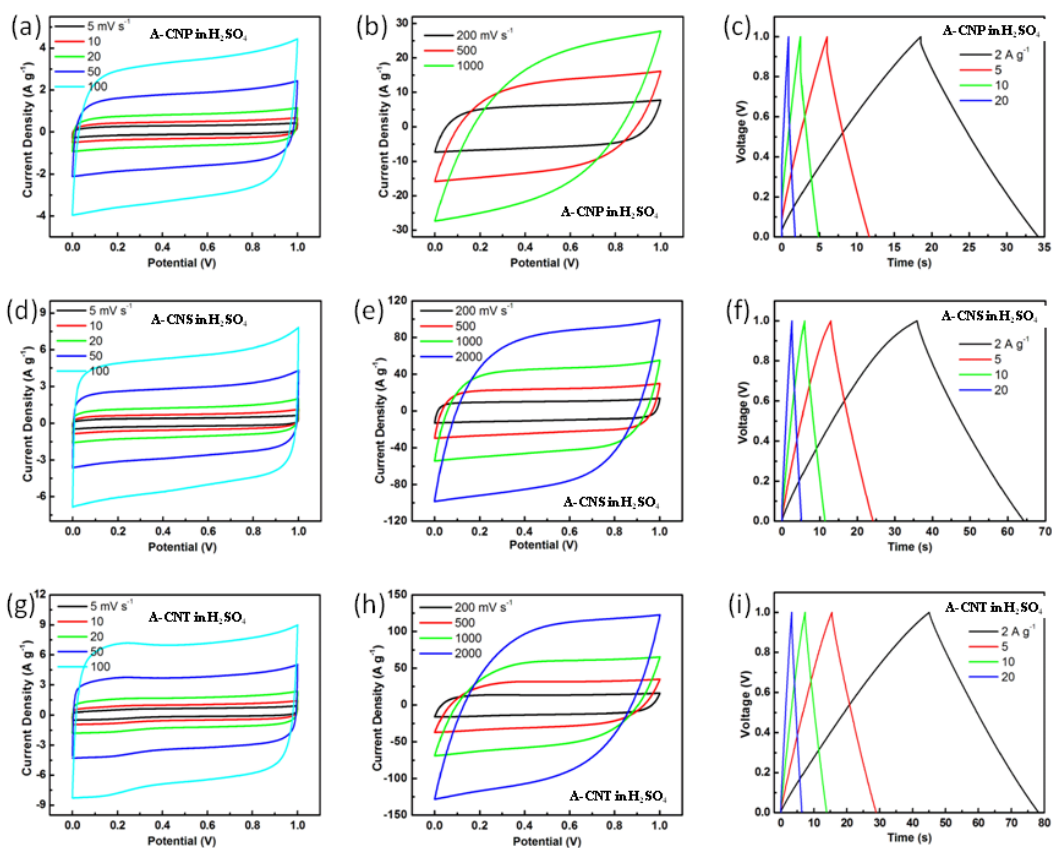

**Figure S7.** Electrochemical performance of the activated nanocarbons in the two-electrode tests in aqueous electrolyte. CV at different scan rates and CD under different current densities of (a-c) A-CNP, (d-f) A-CNS, and (g-i) A-CNT.

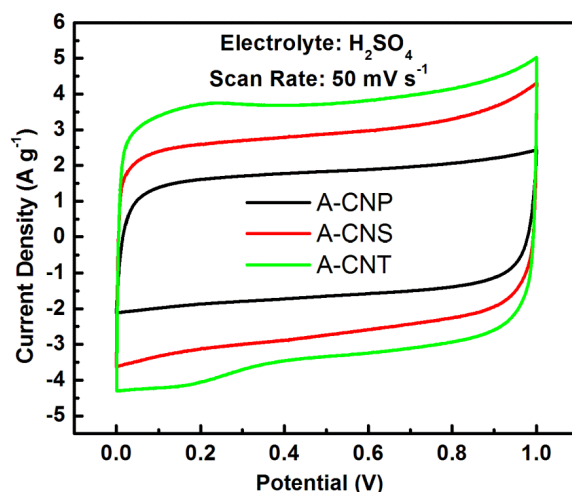

**Figure S8.** CV curves of A-CNP, A-CNS and A-CNT at the same scan rate of  $50 \text{ mV s}^{-1}$  in  $\text{H}_2\text{SO}_4$  aqueous electrolyte.

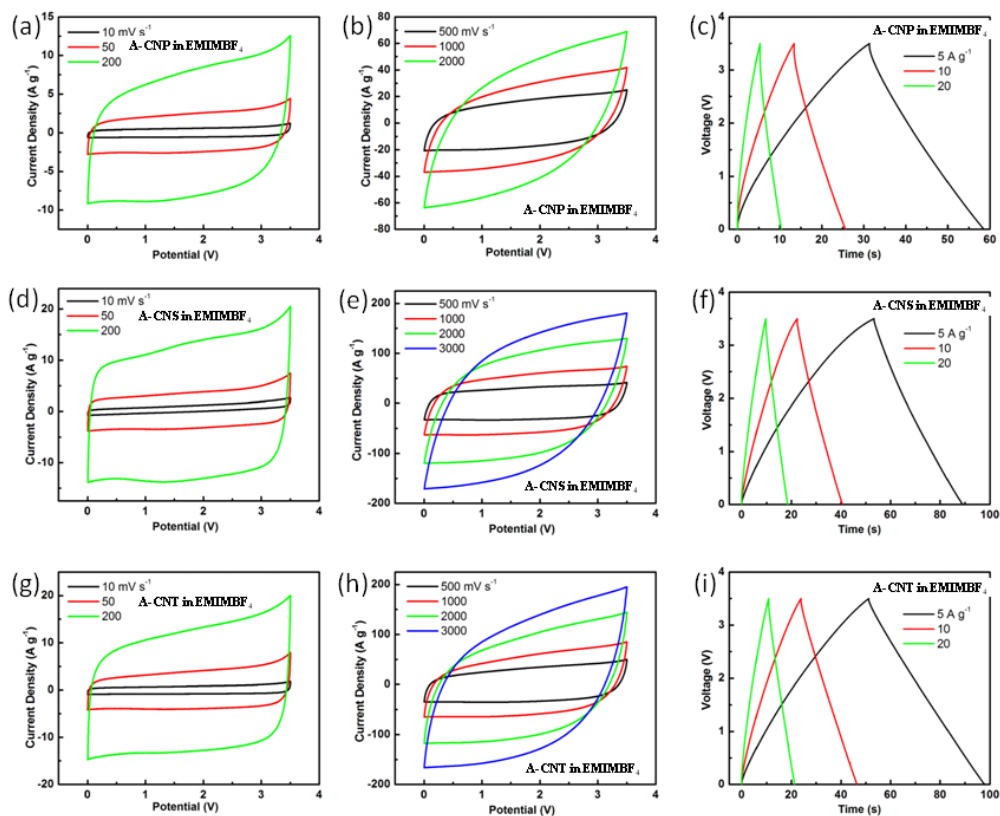

**Figure S9.** Electrochemical performance of the activated nanocarbons in the two-electrode tests in ionic liquid electrolyte. CV at different scan rates and CD under different current densities of (a-c) A-CNP, (d-f) A-CNS, and (g-i) A-CNT.

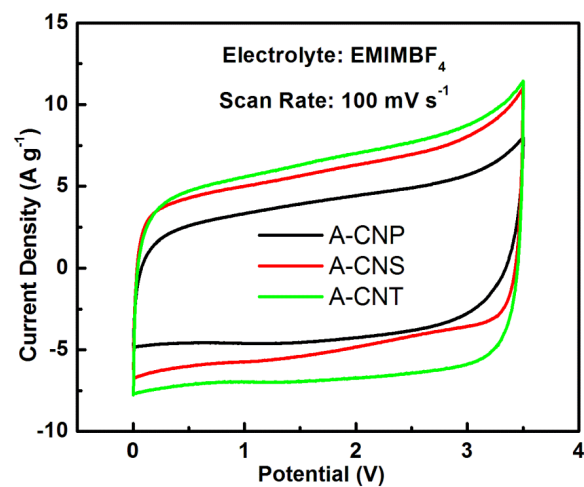

**Figure S10.** CV curves of A-CNP, A-CNS and A-CNT at the same scan rate of 100 mV s<sup>-1</sup> in ionic liquid EMIMBF<sub>4</sub> electrolyte.

**Table S1.** The percentage of the carbon containing functional groups in the total C 1s for CNT and A-CNT.

| Functional groups   | % of the total C 1s |       |       |            |             |        |             |
|---------------------|---------------------|-------|-------|------------|-------------|--------|-------------|
|                     | C=C                 | C-C   | C=N   | C-O-C/C-OH | C=O and C-N | O=C-OH | $\pi-\pi^*$ |
| Binding energy (eV) | 284.5               | 285.2 | 285.8 | 286.6      | 288         | 289.3  | 290.8       |
| CNT                 | 46.6                | 27.0  | 2.3   | 9.7        | 5.3         | 3.3    | 5.8         |
| A-CNT               | 54.8                | 15.1  | 0.9   | 10.6       | 6.4         | 3.9    | 8.3         |

**Table S2.** The percentage of the nitrogen containing functional groups in the total N 1s for CNT and A-CNT.

| Functional groups   | % of the total N 1s |       |             |      |         |
|---------------------|---------------------|-------|-------------|------|---------|
|                     | N1                  | N2    | N3          | N4   | N5      |
| Binding energy (eV) | 398.1-398.6         | 399.4 | 400.4-400.8 | 402  | 404-406 |
| CNT                 | 23.2                | 9.8   | 43.7        | 11.7 | 11.6    |

|       |     |      |      |      |      |
|-------|-----|------|------|------|------|
| A-CNT | 5.3 | 17.7 | 44.3 | 19.9 | 12.8 |
|-------|-----|------|------|------|------|

---

**Table S3.** Physisorption parameters of the nanocarbons.

| Materials                          | Unactivated nanocarbons |       |       | Activated nanocarbons |        |        |
|------------------------------------|-------------------------|-------|-------|-----------------------|--------|--------|
|                                    | CNP                     | CNS   | CNT   | A-CNP                 | A-CNS  | A-CNT  |
| BET ( $\text{m}^2 \text{g}^{-1}$ ) | 17.9                    | 345.8 | 379.9 | 1332.4                | 1957   | 2005.9 |
| Micropore area                     |                         |       |       | 955                   | 687.3  | 1104.3 |
| Mesopore area                      |                         |       |       | 377.4                 | 1269.7 | 901.6  |
| Pore volume                        | 0.1                     | 0.476 | 0.513 | 0.77                  | 1.5    | 1.6    |
| ( $\text{cm}^3 \text{g}^{-1}$ )    |                         |       |       |                       |        |        |
